# Supplementary material
Source: bioRxiv or medRxiv preprint supplement (https://www.biorxiv.org/highwire/filestream/103898/field_highwire_adjunct_files/0/340703-1.pdf)
Supplement: Supplementary file [file 340703-1.pdf]

# Brain regions modulated during covert visual attention in the macaque

Amarender R. Bogadhi, Anil Bollimunta, David A. Leopold, Richard J. Krauzlis

## Supplementary figures

**Figure S1.** Activations during Stimulus mapping experiment (related to Fig. 2)

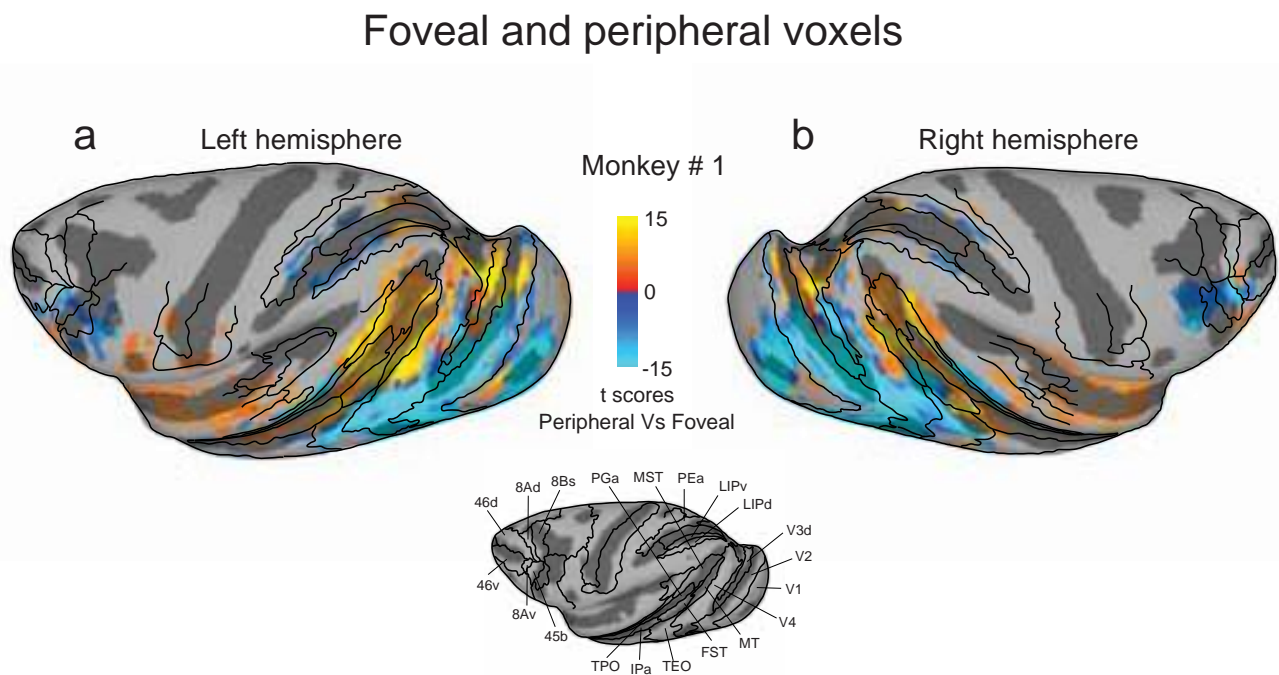

Figure S1. (a, b) T-scores contrasting Peripheral and Central stimulus conditions during stimulus mapping experiment show activations in Peripheral voxels (red to yellow) and Central  $2^0$  voxels (blue to cyan) in left (a) and right (b) hemispheres of monkey # 1. Anatomical boundaries are labeled for the left hemisphere. T-scores were corrected for multiple comparisons (Bonferroni correction;  $p < 0.05$ ,  $|t\text{-score}| > 5.02$ ).

**Figure S2.** Cortical maps of attention-related activation (unthresholded) (related to Fig. 3)

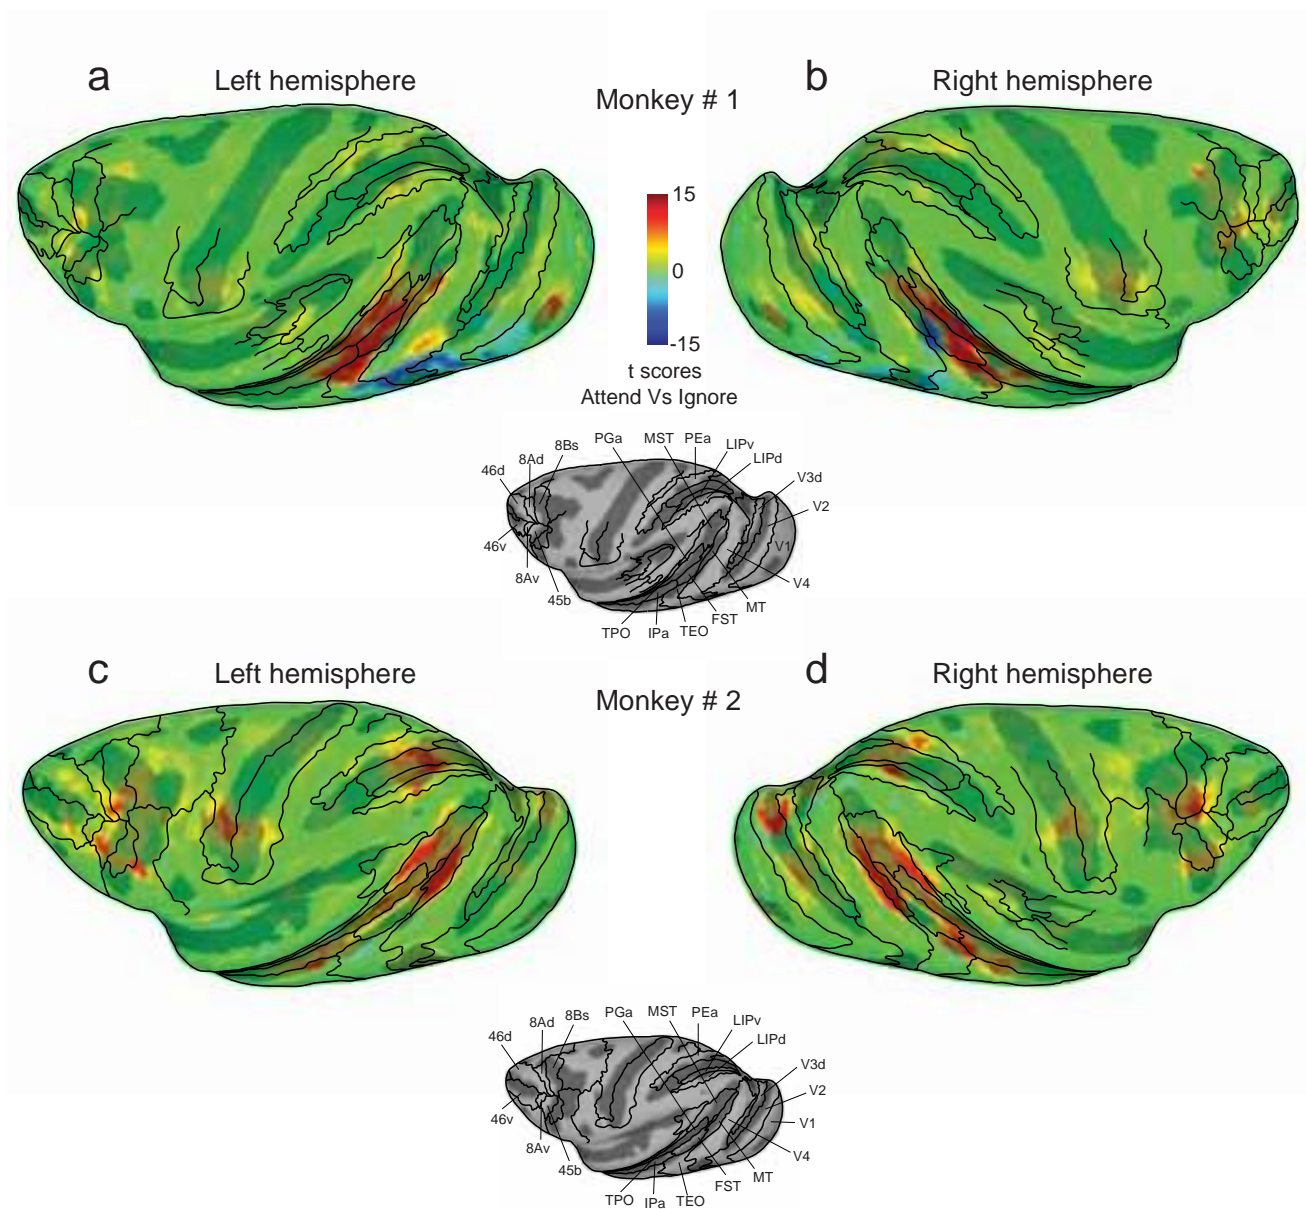

Figure S2. T-scores (unthresholded) contrasting Attend and Ignore tasks were projected onto inflated cortical surfaces of D99 in each monkey's native space along with anatomical boundaries (black contours). (a, b) Inflated cortical maps of t-scores showing attention-related activation in left (a) and right (b) hemispheres of monkey # 1.

Anatomical boundaries are labeled for the left hemisphere in monkey # 1. (c, d) Inflated cortical maps of t-scores showing attention-related activation in left (c) and right (d) hemispheres of monkey # 2. Anatomical boundaries are labeled for the left hemisphere in monkey # 2.

## **Supplementary methods**

### *Experimental apparatus*

Monkeys were seated and head-fixed in a custom-built MR-safe chair with a joystick attached inside the chair. Stimuli were back projected on to a screen placed inside the bore of the vertical magnet using an Epson projector controlled by a Windows 2007 machine running MATLAB R2012b (The Mathworks) with the psychophysics toolbox extensions. The timing of the stimuli and events were controlled by a QNX system running QPCS. Monkey viewed the screen through a mirror placed in front at a 45° angle. The total viewing distance of the screen was 53 cm. Eye movements were acquired and monitored in the scanner using an iView system (Version 2.4, SensoMotoric Instruments). Eye signal was calibrated at the beginning of each session. Joystick presses and releases were detected by disruption of an optic-fiber transmission using a custom-built device. Joystick was calibrated once at the beginning of the experiments.

### *Random dot motion stimuli*

The random dot motion stimuli were circular patches of moving dots, with the direction of motion of each dot drawn from a normal distribution with a mean value

(defined as the patch motion direction) at 30° above horizontal and a 16° standard deviation. The lifetime (10 frames, 100 ms), density (25 dots/°<sup>2</sup>/s), and speed of the dots (15 °/s) were held constant. The radius of the aperture was set to 3°. Luminance of each moving dot in the motion patches was 50 cd/m<sup>2</sup>. The change in direction of motion ( $\Delta$ ) was  $1 \pm 0.25$  standard deviations for both monkeys across sessions.

#### *Fixation spot stimulus*

The size of the fixation spot was 0.23° and the size of the central cue was 0.35°. The background luminance of the screen was 14 cd/m<sup>2</sup> and the luminance of the fixation spot was 50 cd/m<sup>2</sup>. The luminance change in fixation spot during Baseline and FA trials was 1-2 cd/m<sup>2</sup> across sessions for both monkeys.

#### *Stimulus mapping experiment*

To identify voxels responding to foveal and peripheral stimuli locations, a flickering checker board stimulus (4 Hz) that has concentric rings of 2° width spanning up to 12° eccentricity was used. In foveal visual stimulation blocks, the checker board stimulus was masked everywhere except for the central 2° radius. In peripheral visual stimulation blocks, the checker board stimulus was masked everywhere except for the two eccentric stimulus locations used in the attention tasks. The foveal and peripheral stimulation blocks (20 s duration) were interleaved with fixation blocks (10 s duration). A total of 258 runs (150 in Monkey #1; 108 in Monkey # 2) were collected in both monkeys across 13 sessions. Functional maps showing peripheral and foveal voxels were

67 created using the same methods as described for creating functional maps for the  
68 attention tasks (Fig. S2).

69
